# Supplementary material for: Non-invasive transdermal delivery of peptide inhibitors of the IL-23/IL-17 axis by novel ionic liquid biomaterials for psoriasis treatment
Source: Royal Society of Chemistry journal article supplement (doi:10.1039/d5bm01168j), 2025-11-28
Supplement: d5bm01168j1.pdf [file d5bm01168j1.pdf]

## Supporting Information For

### **Non-Invasive Transdermal Delivery of Peptide Inhibitors of IL-23/IL-17 Axis by Novel Ionic Liquids Biomaterials for Psoriasis Treatment**

Xiaolei Ma<sup>a1</sup>, Zun Wang<sup>b1</sup>, Mihribangvi Alip<sup>a</sup>, Qi Mao<sup>c</sup>, Cheng Zhao<sup>a</sup>, Huayong Zhang<sup>a</sup>, Genhong Yao<sup>a\*</sup>, Lingyun Sun<sup>a</sup>, Lei Jiang<sup>b\*</sup>

<sup>a</sup>Department of Rheumatology and Immunology, The Affiliated Drum Tower Hospital of Nanjing University Medical School, Nanjing, China

<sup>b</sup>NMPA Key Laboratory for Research and Evaluation of Pharmaceutical Preparations and Excipients and Department of Pharmaceutics, School of Pharmacy, China Pharmaceutical University, Nanjing, China

<sup>c</sup>Abhasvara Therapeutics, Nanjing, China

\*Corresponding authors at: Department of Rheumatology and Immunology, The Affiliated Drum Tower Hospital of Nanjing University Medical School, 22 Hankou Road, Nanjing 210093, China; NMPA Key Laboratory for Research and Evaluation of Pharmaceutical Preparations and Excipients and Department of Pharmaceutics, School of Pharmacy, China Pharmaceutical University, 24 Tong Jia Xiang, Nanjing 210009, China.

E-mail addresses: yaogenhong@nju.edu.cn (G. Yao), lei.jiang@cpu.edu.cn (L. Jiang).

<sup>1</sup>Xiaolei Ma and Zun Wang contributed equally to this work.

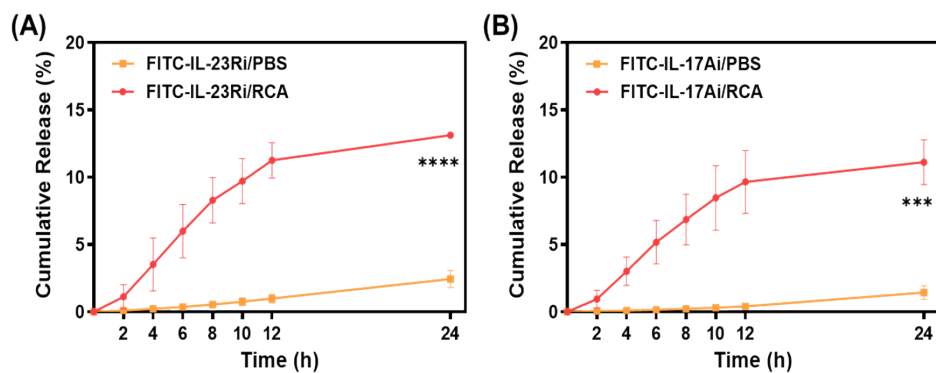

**Figure S1.** 24-hour cumulative penetration rate of FITC-IL-23Ri (A) and FITC-IL-17Ai (B).  
( Mean  $\pm$  SD , n = 3 )

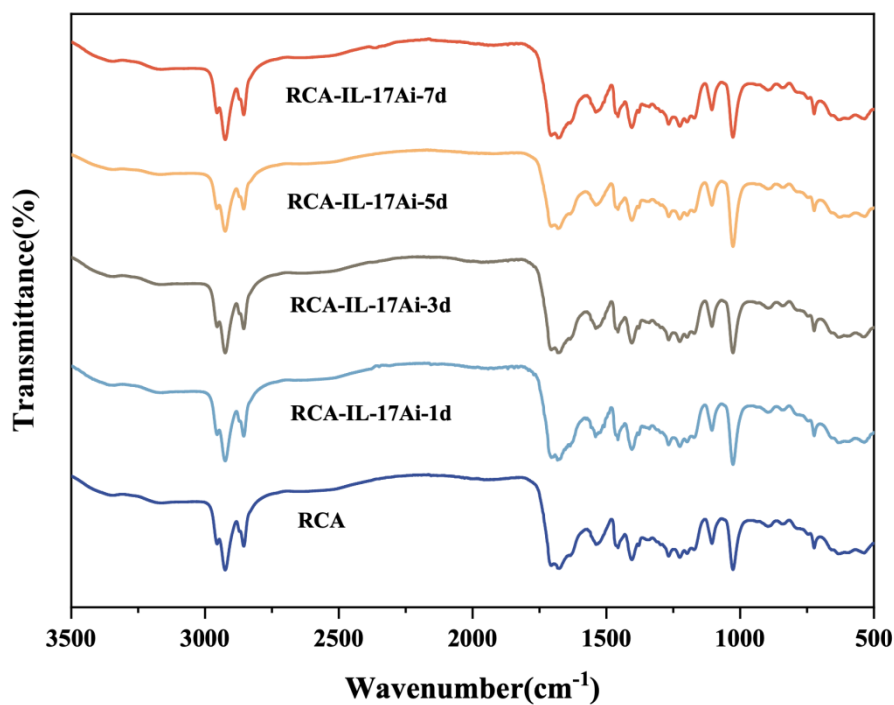

**Figure S2.** FT-IR spectrum of ionic liquids RCA loaded with IL-17Ai.

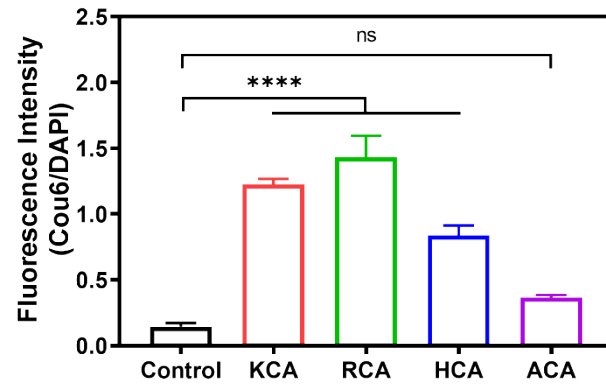

**Figure S3.** Fluorescence intensity ratio (Green/Blue) of Control, KCA, RCA, HCA, ACA.

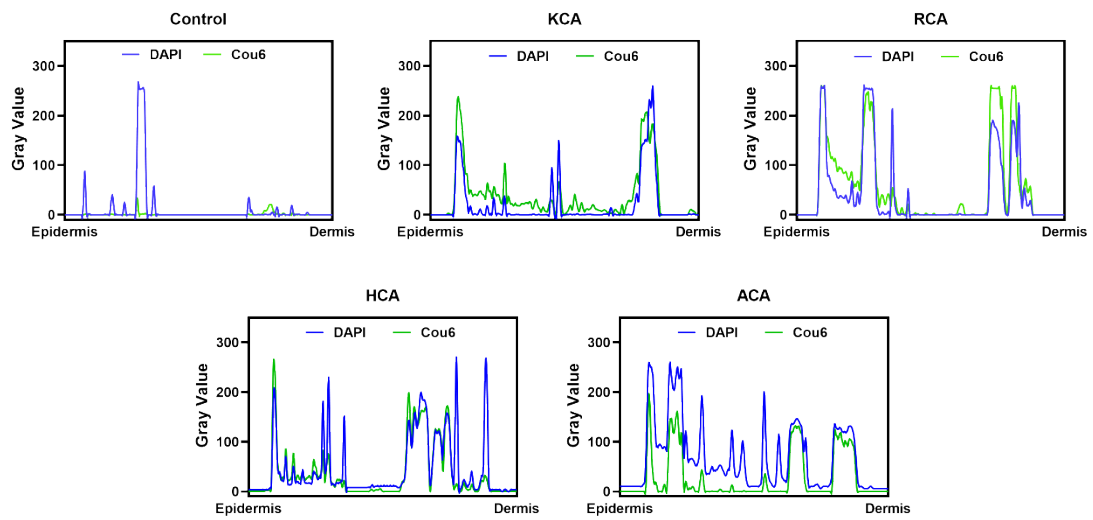

**Figure S4.** Fluorescence intensity of Cou6 and DAPI between the epidermis and the dermis of the skin treated by Control, KCA, RCA, HCA, ACA.

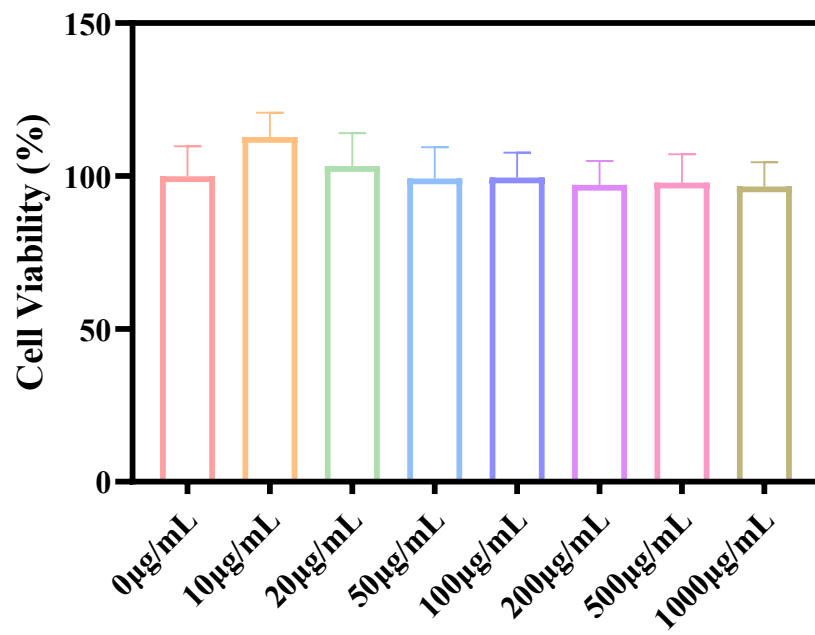

**Figure S5.** The relative cell viability of the cells after co-incubation with RCA for 24 hours.  
(Mean  $\pm$  SD, n = 6)

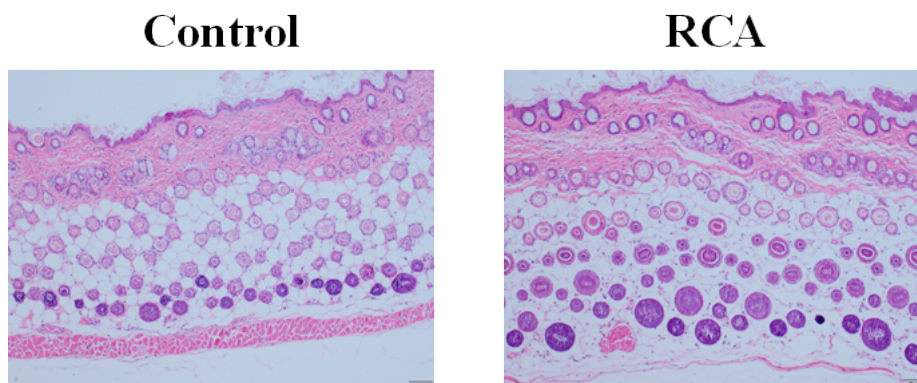

**Figure S6.** H&E staining of skin from mice of control and RCA group.

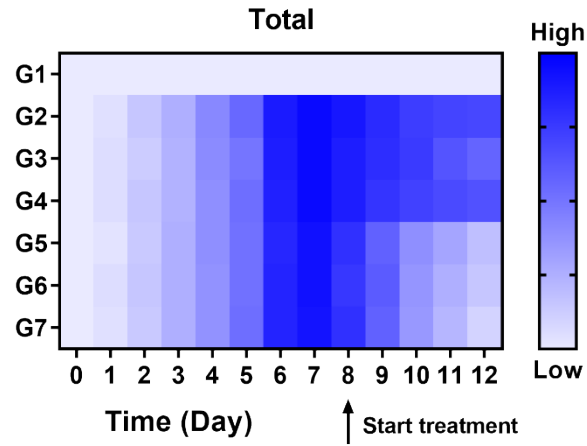

**Figure S7.** Total PASI scores of psoriatic skin after the treatment.

G1 : Control ; G2 : IMQ Model ; G3 : IL-23Ri&IL-17Ai/PBS ; G4 : RCA ; G5 : IL-23Ri/RCA ; G6 : IL-17Ai/RCA ; G7 : IL-23Ri&IL-17Ai/RCA

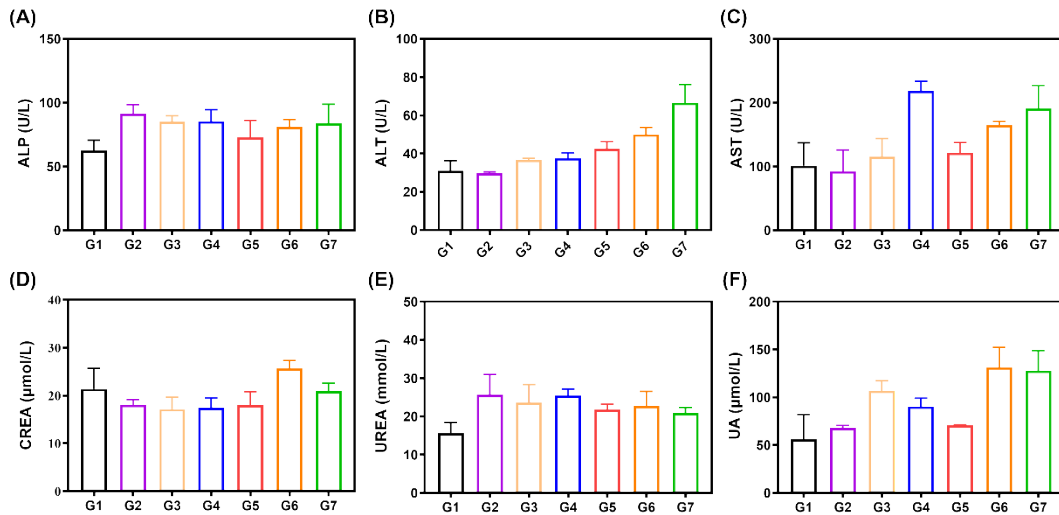

**Figure S8.** ALP, ALT, AST, CREA, UREA, and UA levels in mouse serum after treatment.

G1 : Control ; G2 : IMQ Model ; G3 : IL-23Ri&IL-17Ai/PBS ; G4 : RCA ; G5 : IL-23Ri/RCA ; G6 : IL-17Ai/RCA ; G7 : IL-23Ri&IL-17Ai/RCA
